# Supplementary material
Source: PubMed Central journal article supplement (PMC3414884)

# **Self-Assembly of Thin Plates from Micrococcal Nuclease-Digested Chromatin of Metaphase Chromosomes**

**Maria Milla and Joan-Ramon Daban**

Departament de Bioquímica i Biologia Molecular, Facultat de Biociències,  
Universitat Autònoma de Barcelona, 08193-Bellaterra, Spain

## **Supporting Material**

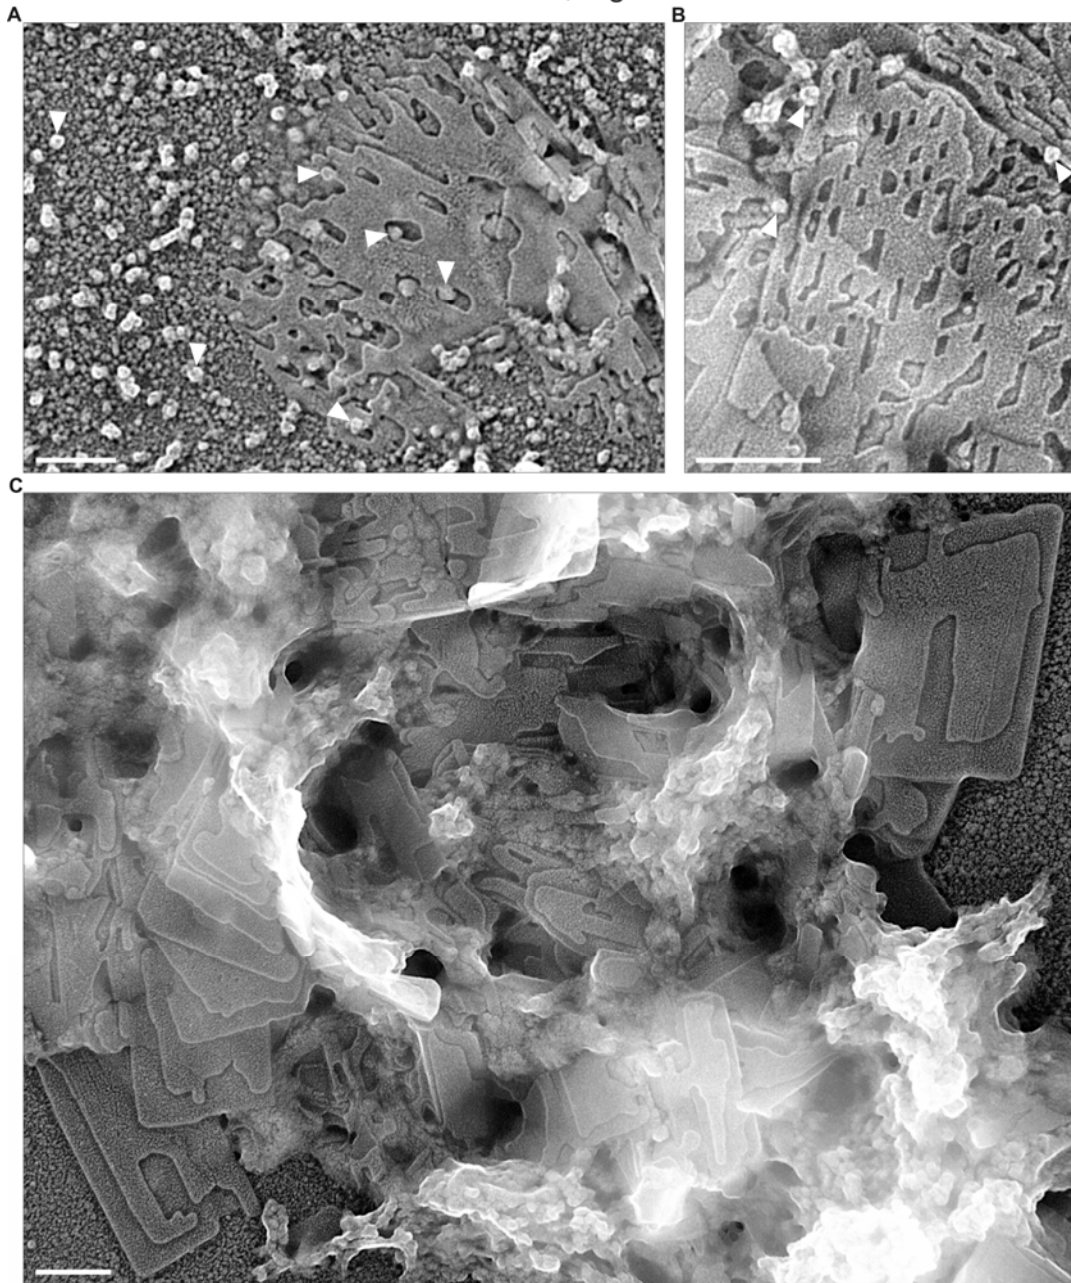

**Fig. S1.** More examples of TEM images corresponding to plates formed by association of metaphase chromatin fragments. Chromatin fragments (obtained by micrococcal nuclease digestion of metaphase chromosomes) extensively dialyzed at 4°C against the self-assembly solution (10 mM Pipes, pH 7.2, 120 mM KCl, 20 mM NaCl, and 17 mM MgCl<sub>2</sub>) produced multilaminar structures of different sizes. (A,B) Small plates and chromatin fragments folded as short compact 30-nm fibers seen in top view (some of them are indicated with *head arrows*); note that some fragments probably were in the process of being associated with the growing plates when the sample was spread on the carbon-coated grid; (C-F) Examples of larger plates obtained in the same experiments. Additional details are given in Fig. 1. Scale bars: 200 nm.

Milla & Daban, Fig.S1D

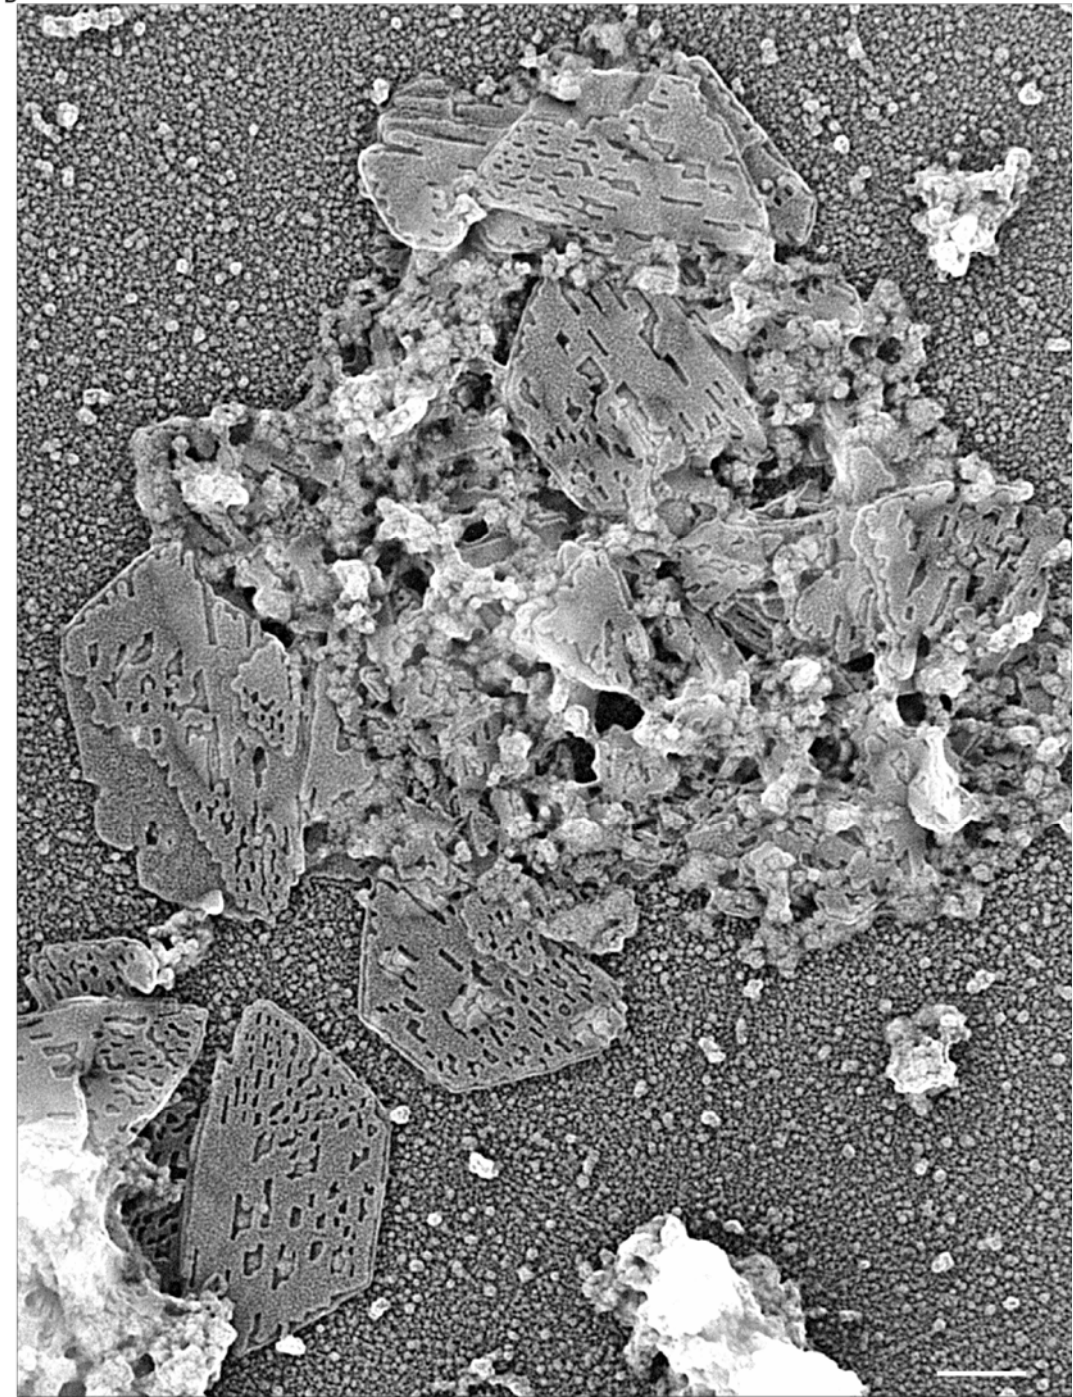

Milla & Daban, Fig.S1E,F

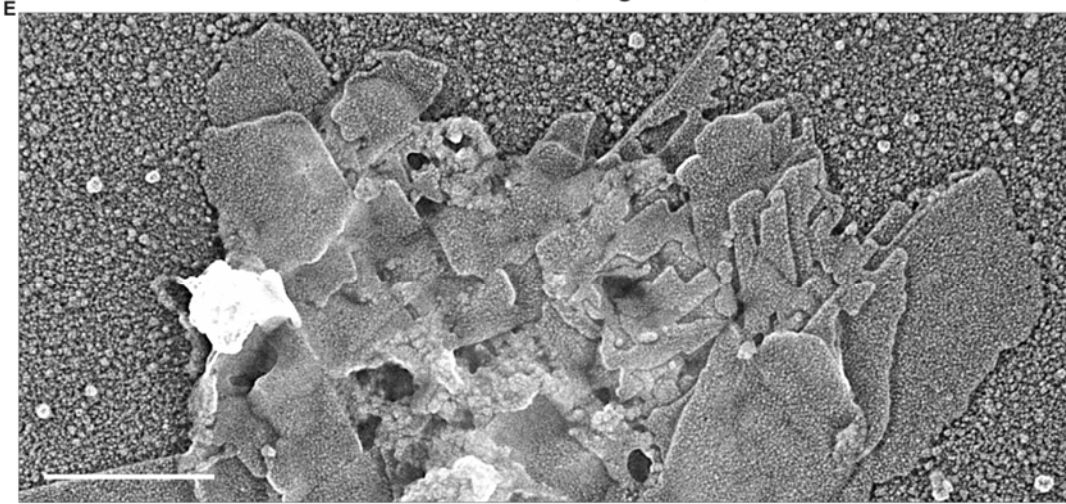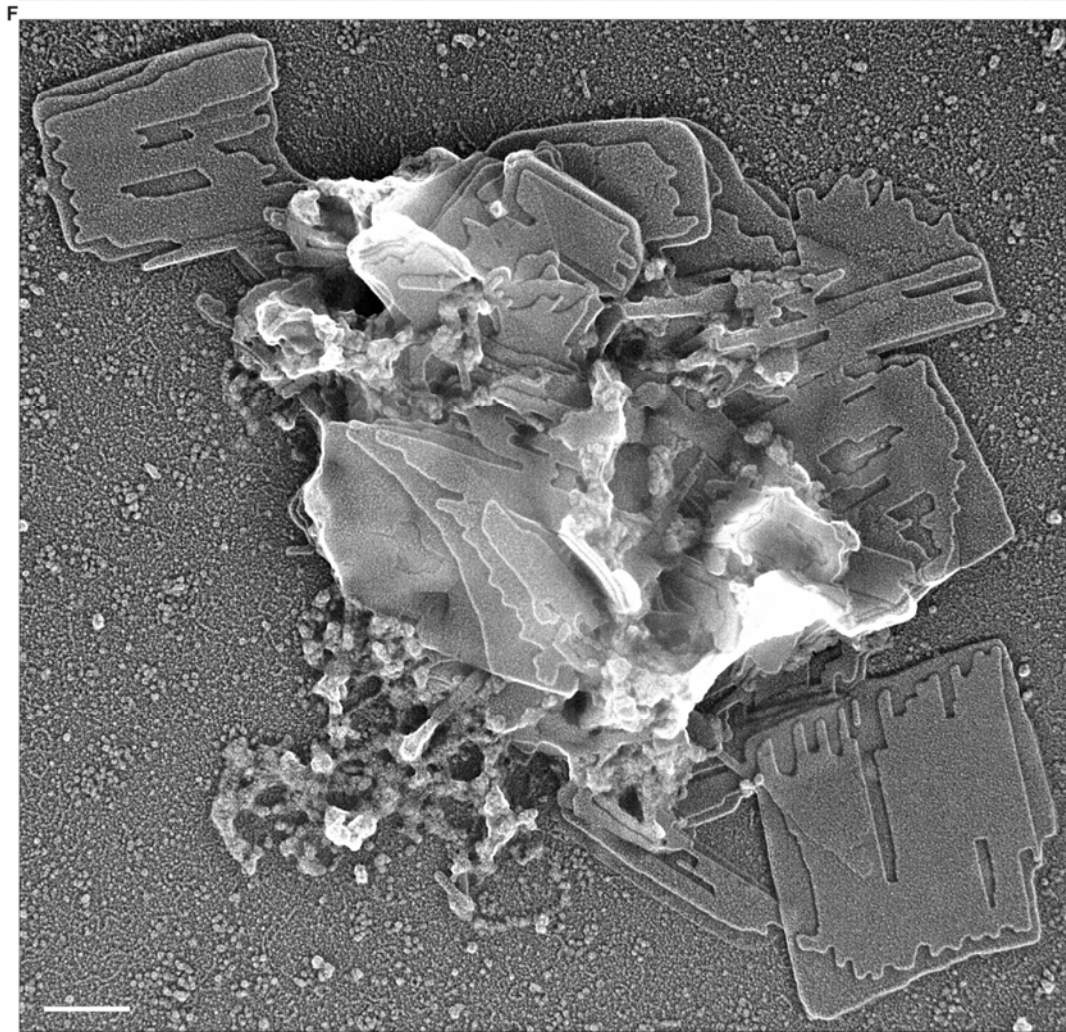

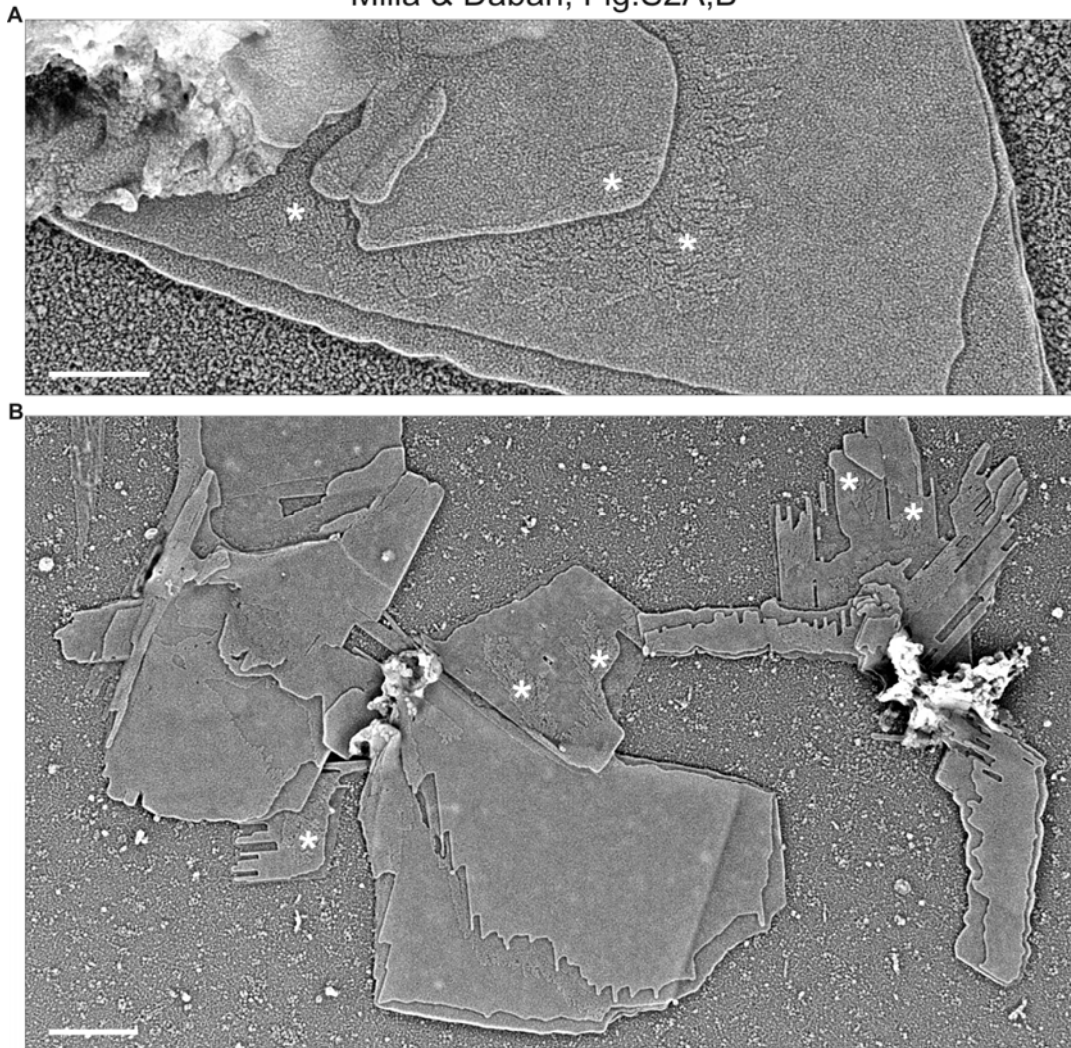

**Fig. S2.** Additional examples of self-assembled chromatin plates having partially unfolded layers. (A,B) Plates showing regions with a granular texture (indicated by *asterisks*); presumably these granules are unorganized nucleosomes in chromatin filaments not completely incorporated into well-defined layers. Additional details are given in Fig. 2. Scale bars: 200 nm (A); 500 nm (B).

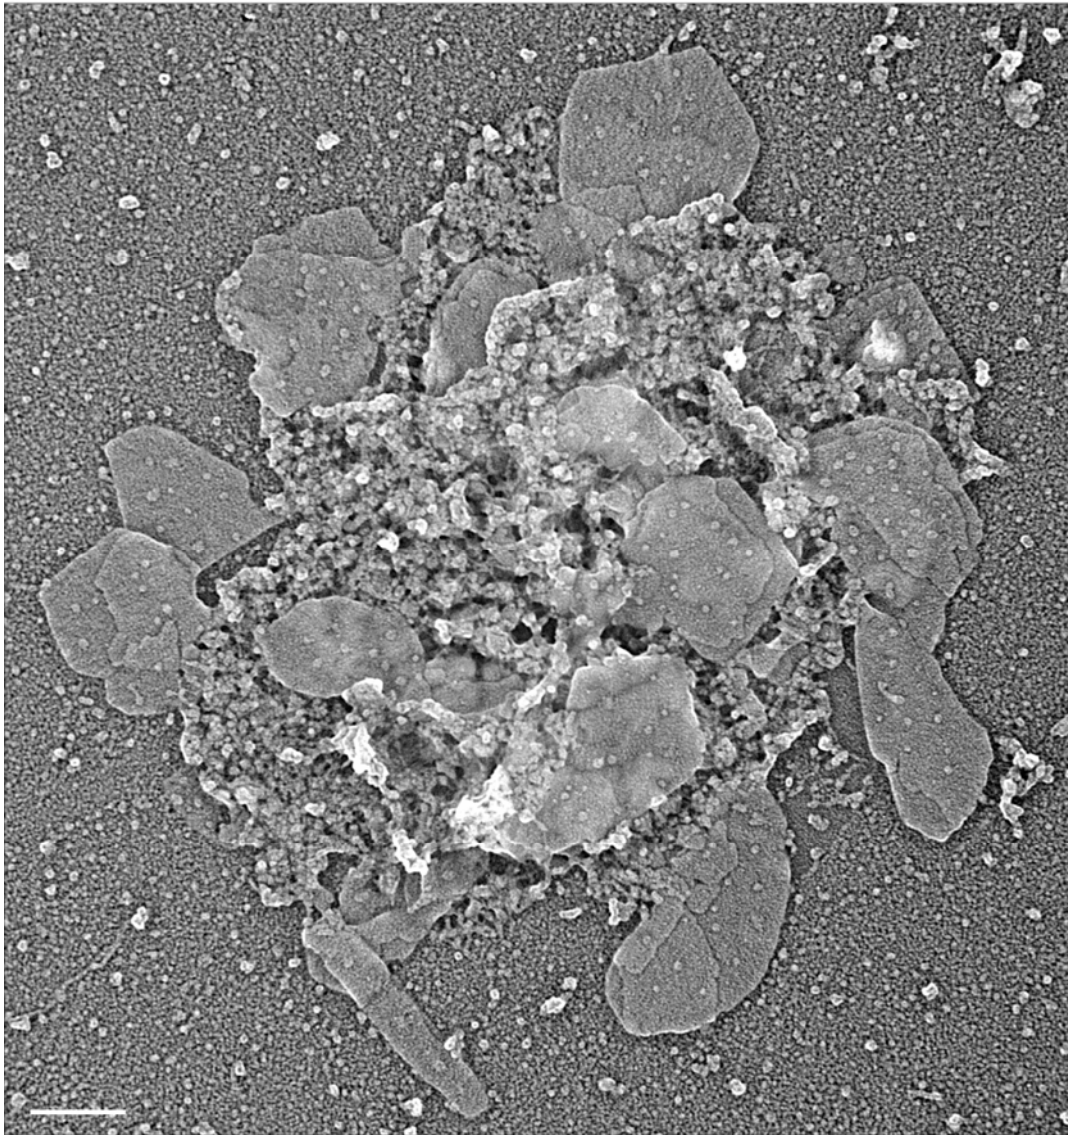

**Fig. S3.** Additional example of plate self-assembly from metaphase chromatin fragments purified by nondenaturing electrophoresis. Plates obtained by self-assembly of chromatin fragments having a DNA length (~8 kb) corresponding to ~42 nucleosomes. Additional details are given in Fig. 3. Scale bar: 200 nm.

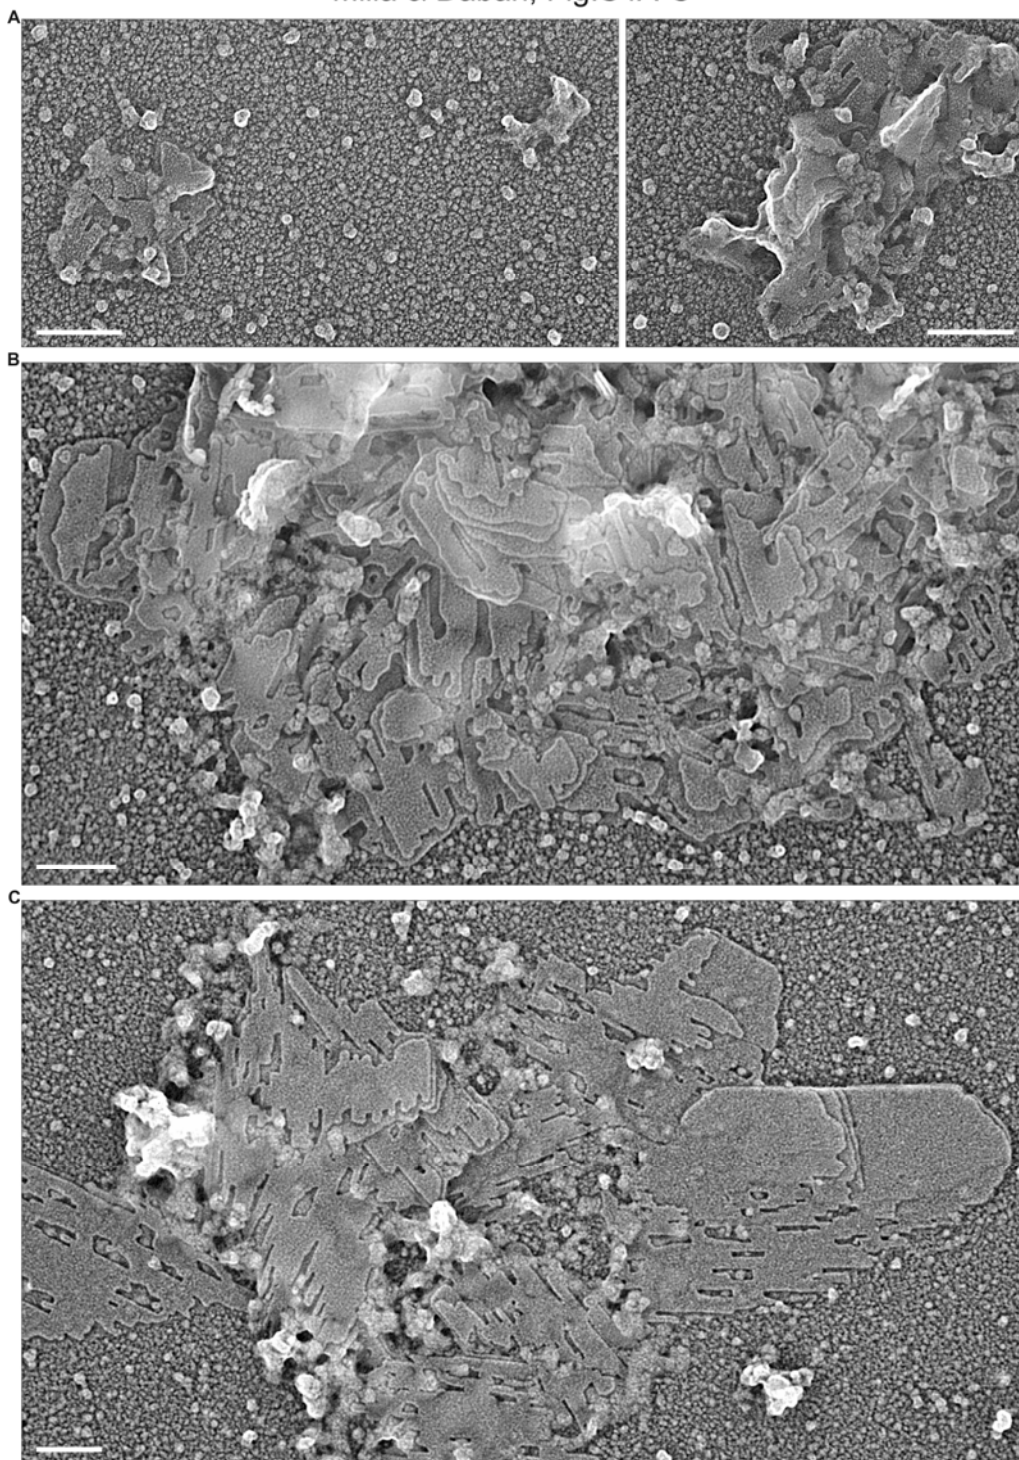

**Fig. S4.** More examples of plates formed by association of metaphase chromatin fragments at different temperatures. (A-C) 25°C; (D-H) 37°C. The dialysis times were: 3 h (A), 5 h (E), 7 h (C,F-H), 10 h (D), and 24 h (B). The samples in G and H were unidirectionally shadowed to measure the plate height; latex spheres were included as internal reference to determine the shadowing angle corresponding to each micrograph. Additional details are given in Fig. 4. Scale bars: 200 nm (A-E,G,H); 500 nm (F).

Milla & Daban, Fig.S4D-H

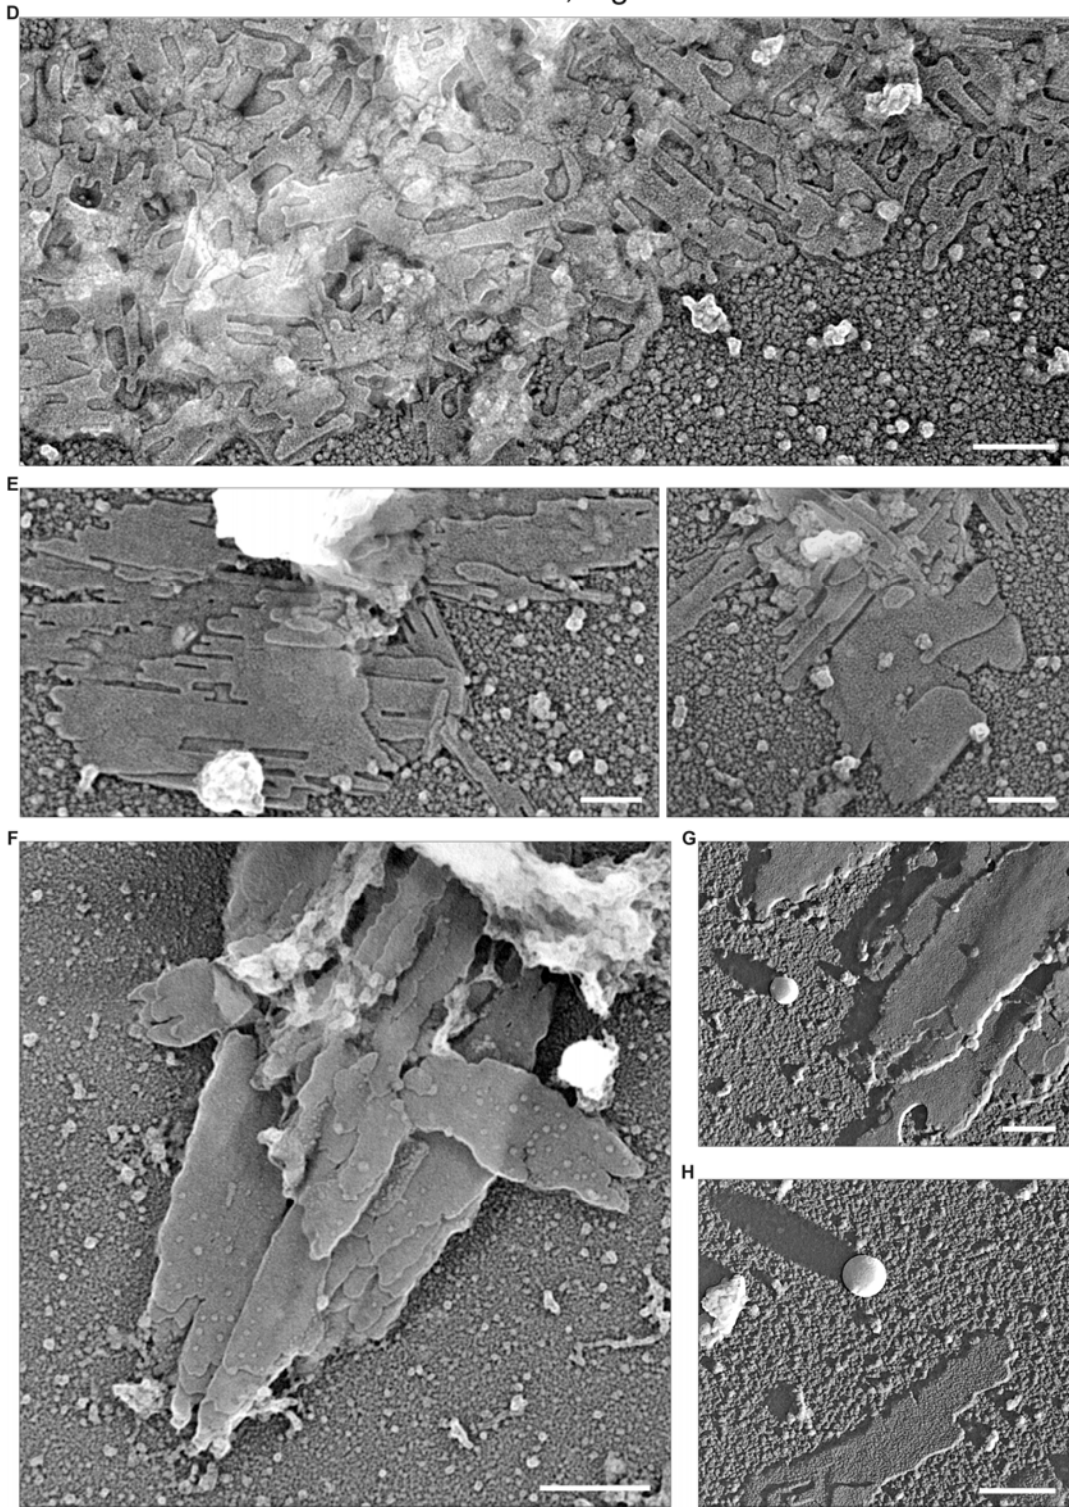

Supplement: mmc1.pdf [file mmc1.pdf]
